# Supplementary material for: The severity of hereditary porphyria is modulated by the porphyrin exporter and Lan antigen ABCB6
Source: PubMed Central journal article supplement (PMC4987512; doi:10.1038/ncomms12353), 2016-08-10
Supplement: ncomms12353-s1.pdf [file ncomms12353-s1.pdf]

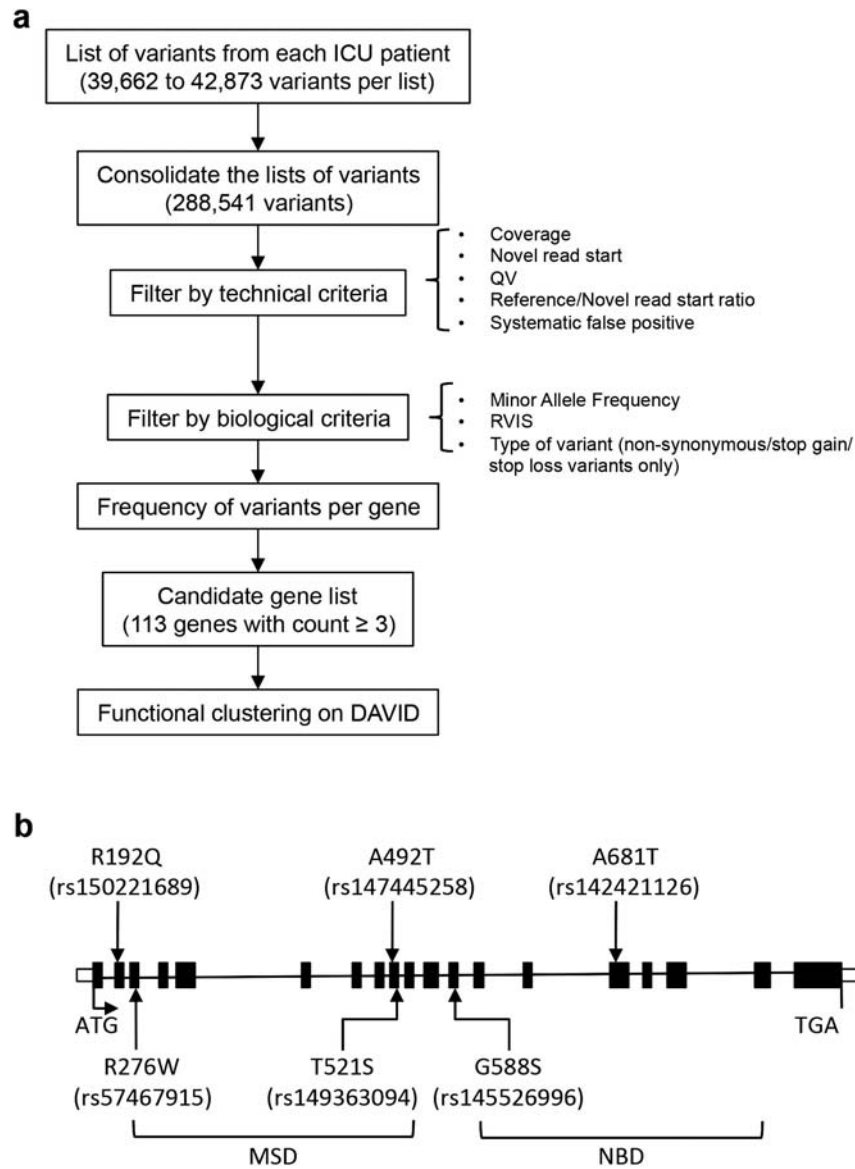

**Supplementary Figure 1. Filtering strategy in candidate gene analysis and exon position of *ABCB6* variants found in the cohort. a)** Flow chart describing the exome sequencing data analysis of Symptomatic-ICU patients. **b)** Schematic drawing of *ABCB6* gene is shown with *ABCB6* non-synonymous variants indicated with arrows. MSD, membrane-spanning domain; NBD, nucleotide-binding domain.

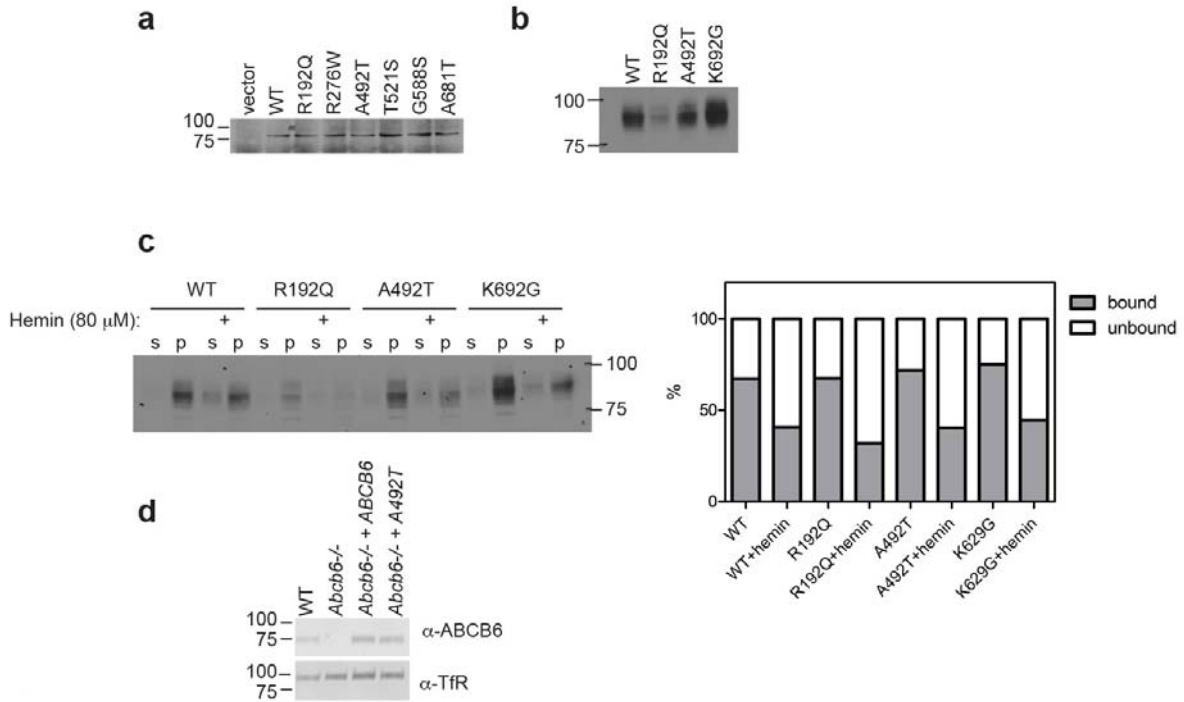

**Supplementary Figure 2. ABCB6 variant alleles do not have altered transcription/translation and heme binding.** **a)** Immunoblot of *in vitro* transcription/translation-coupled assay using plasmids encoding listed variant ABCB6 using anti-FLAG antibody. NIH3T3 cells were transiently transfected with plasmids encoding WT, R192Q, A492T, or K629G-V5. Immunoblots of **b)** total lysate (input) and **c)** hemin-agarose pull-down assays in the presence (+) or absence of heme to determine heme-binding capacity of ABCB6 variants (bound (p, pellet) and unbound (s, soluble)). **d)** Membrane vesicle preparations from indicated MEL cell lines were analyzed for ABCB6 expression (TfR, transferrin receptor is shown as a control).

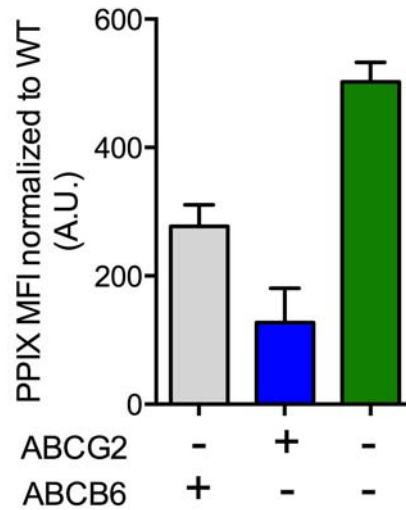

**Supplementary Figure 3. Both ABCB6 and ABCG2 contribute to PPIX efflux in mouse reticulocytes.** Peripheral blood collected from WT or *Abcb6*<sup>-/-</sup> mice were treated with either DMSO or 10  $\mu$ M PPIX with or without 5  $\mu$ M FTC as indicated for 1 hr at 37°C. Intracellular PPIX concentrations in reticulocytes (TO<sup>+</sup>/Ter119<sup>+</sup>) were measured by FACS. PPIX levels were normalized to WT cells incubated with PPIX (*Abcg2* was inhibited by FTC, while *Abcb6* was genetically knocked out). A.U., arbitrary unit.



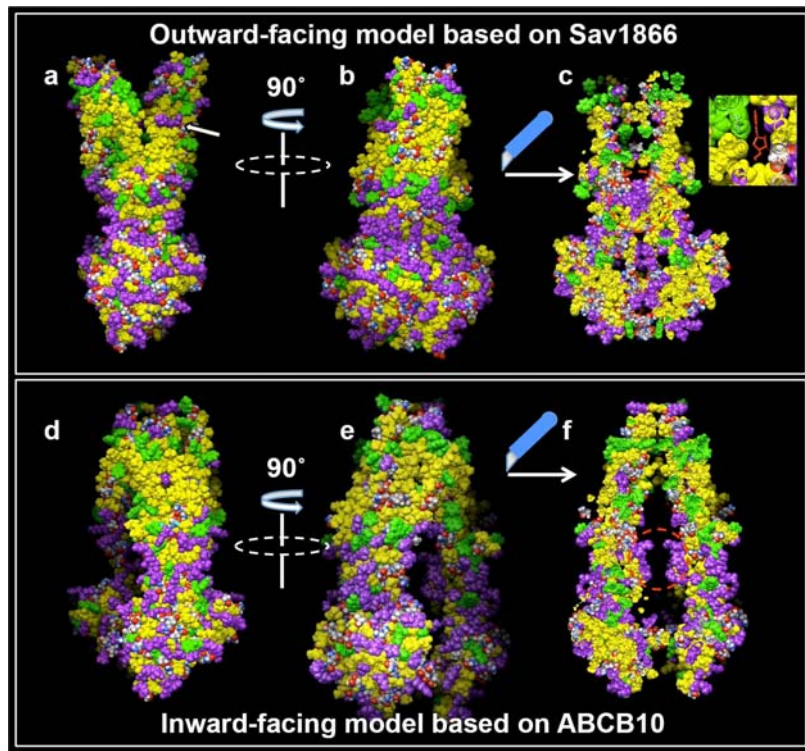

**Supplementary Figure 5. Views of the outward-facing (a-c) and inward facing (d-f) homology models for ABCB6.** Surface views (a,b & d,e) are orthogonal to each other, as indicated by the rotation symbol. Central slices (c,f) are shown where the slice is taken orthogonal to the viewing direction in (b,e). Color key for amino acid residue types: Yellow – hydrophobic. Green-aromatic. Purple-charged. CPK- polar. The lower intracytoplasmic loops and nucleotide-binding domains display surface residues that are predominantly polar and charged, but with hydrophobic cores that are revealed by the central slices (c,f). The cluster of charged residues in the central translocation channel is intriguing (red dashed circle, views c & f). The upper transmembrane segment is visible as a 4 nm wide band of hydrophobic residues bounded by clusters of aromatic residues. A few surface-exposed charged residues in the TM region (a,b,d,e) are visible and will be energetically unfavored, however there is no obvious patch of polar/charged residues that might indicate an interface for the additional N-terminal transmembrane helices of ABCB6 (which cannot be modeled). The charged pair R276/E275 discussed in the main text is indicated by the white arrow (view a). Note this pair is mostly internalized in the inward-facing model (view d).

Inset, view c: No ADP nor ATP was employed in the homology modeling. Nevertheless the ATP binding cavity is preserved in the outward-facing model, including a stacking interaction with a Tyr residue. The small cavity where the ATP terminal phosphate is bound is also preserved (this phosphate is lacking in the Sav1866 model which is the ADP bound state) and also its exit channel to the surface is preserved. This implies that this model – even after significant energy minimization is reasonable.



Supplementary Figure 2a

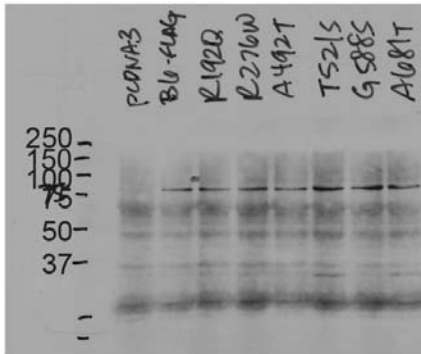

Supplementary Figure 2b, 2c

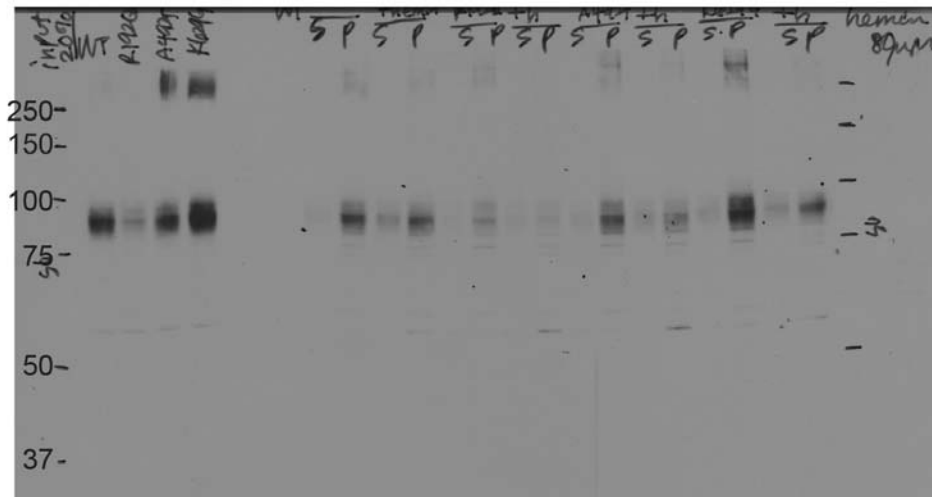

Supplementary Figure 2d

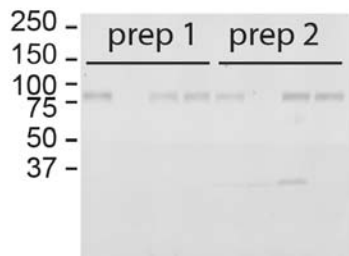

**Supplementary Figure 7. Full scan of immunoblots in supplementary figures.** Immunoblots from Supplementary Figures 2a, 2b, 2c, and 2d are shown.

**Table 1. Detailed patient information.** Patients within the same family are preceded by the same letter in the sample ID. In addition to a nonsense *HMBS* mutation, exome sequencing discovered that patient C1 was heterozygous for a *FECH* p.G55C mutation. ##Further study showed that she was also heterozygous for the IVS3-48T>C splicing mutation known to cause erythropoietic protoporphyria when *in trans* with a *FECH* mutation. Family studies were not available to determine the phase between the two *FECH* mutations. ###Patient X1 inherited an atypical low expression allele that is not the commonly described IVS3-48T>C splicing mutation. This low expression allele has 48% of cDNA compared to the normal allele and is *in trans* with *FECH* p.F260L. Sx, symptomatic.

| Sex | ID # | Diagnosis | Porphyria mutation                                             | ABCG2 variant | ABCB6 variant | Phenotypic classification | Porphyrin Cr <sup>-1</sup> (0-35 nmol mmol <sup>-1</sup> ) |
|-----|------|-----------|----------------------------------------------------------------|---------------|---------------|---------------------------|------------------------------------------------------------|
| M   | A1   | AIP       | HMBS p.G24D                                                    | nil           | nil           | Sx-no admission           | <b>73</b>                                                  |
| F   | A2   | AIP       | HMBS p.G24D                                                    | nil           | nil           | Sx-no admission           | 17                                                         |
| F   | B1   | AIP       | HMBS c.33+1G>T                                                 | nil           | nil           | Sx-admission              | na                                                         |
| F   | B2   | AIP       | HMBS c.33+1G>T                                                 | p.V12M        | nil           | Asymptomatic              | na                                                         |
| F   | B3   | AIP       | HMBS c.33+1G>T                                                 | p.V12M        | nil           | Asymptomatic              | na                                                         |
| F   | B4   | AIP       | HMBS c.33+1G>T                                                 | nil           | nil           | Sx-admission              | <b>106</b>                                                 |
| M   | B5   | AIP       | HMBS c.33+1G>T                                                 | nil           | nil           | Sx-admission              | na                                                         |
| F   | B6   | AIP       | HMBS c.33+1G>T                                                 | nil           | p.G588S       | Sx-admission              | <b>346</b>                                                 |
| F   | B7   | AIP       | HMBS c.33+1G>T                                                 | p.V12M        | p.G588S       | Sx-ICU                    | <b>61</b>                                                  |
| F   | C1   | AIP       | HMBS p.G111*; <i>FECH</i> p.G55C and <i>FECH</i> IVS3-48T>C ## | nil           | nil           | Sx-ICU                    | <b>328</b>                                                 |
| F   | D1   | AIP       | HMBS c.345-1G>A                                                | nil           | nil           | Sx-admission              | <b>236</b>                                                 |
| F   | E1   | AIP       | HMBS p.R116W                                                   | p.V12M        | nil           | Sx-no admission           | na                                                         |
| F   | F1   | AIP       | HMBS p.R149*                                                   | nil           | p.A681T       | Sx-ICU                    | <b>218</b>                                                 |
| M   | G1   | AIP       | HMBS p.R195H                                                   | nil           | nil           | Asymptomatic              | <b>51</b>                                                  |
| F   | H1   | AIP       | HMBS p.R225*                                                   | nil           | nil           | Sx-no admission           | na                                                         |
| F   | I1   | AIP       | HMBS p.R225*                                                   | p.V12M        | p.A492T       | Sx-ICU                    | <b>169</b>                                                 |
| F   | J1   | AIP       | HMBS c.913-2A>G                                                | p.V12M        | nil           | Sx-ICU                    | na (overseas)                                              |
| F   | K1   | AIP       | HMBS p.Q314Vfs*8                                               | nil           | nil           | Sx-admission              | <b>35-438</b>                                              |
| M   | L1   | HCP       | CPOX p.P134H                                                   | nil           | nil           | Asymptomatic              | na                                                         |
| F   | M1   | HCP       | CPOX p.T286K                                                   | p.V12M        | nil           | Sx-admission              | 11                                                         |
| F   | M2   | HCP       | CPOX p.T286K                                                   | p.V12M        | nil           | Sx-admission              | <b>55</b>                                                  |
| F   | N1   | HCP       | CPOX p.A293P                                                   | nil           | nil           | Sx-no admission           | <b>86</b>                                                  |
| M   | N2   | HCP       | CPOX p.A293P                                                   | nil           | p.R192Q       | Asymptomatic              | 9                                                          |
| F   | O1   | HCP       | CPOX p.R332Q                                                   | nil           | nil           | Sx-admission              | <b>49</b>                                                  |
| F   | P1   | HCP       | CPOX p.Q355P                                                   | nil           | nil           | Asymptomatic              | <b>206</b>                                                 |
| F   | P2   | HCP       | CPOX p.Q355P                                                   | nil           | nil           | Sx-no admission           | na                                                         |
| M   | P3   | HCP       | CPOX p.Q355P                                                   | nil           | nil           | Asymptomatic              | na                                                         |
| F   | Q1   | HCP       | CPOX p.H431Lfs*60                                              | nil           | nil           | Asymptomatic              | Na                                                         |
| F   | R1   | VP        | PPOX p.R59W                                                    | nil           | nil           | Asymptomatic              | 8                                                          |
| F   | S1   | VP        | PPOX p.R59W                                                    | nil           | nil           | Asymptomatic              | 29                                                         |
| M   | T1   | VP        | PPOX c.471+1G>A                                                | nil           | p.R276W       | Sx-ICU                    | <b>621</b>                                                 |
| F   | U1   | VP        | PPOX p.Q189*                                                   | nil           | nil           | Sx-no admission           | 23                                                         |
| F   | V1   | VP        | PPOX p.Q375*                                                   | p.V12M        | nil           | Sx-no admission           | <b>272</b>                                                 |
| F   | W1   | VP        | PPOX p.E378Rfs*24                                              | nil           | p.R276W       | Sx-no admission           | <b>45</b>                                                  |
| F   | W2   | VP        | PPOX p.E378Rfs*24                                              | nil           | nil           | Sx-admission              | 8                                                          |
| F   | X1   | EPP       | <i>FECH</i> p.F260L ###                                        | p.V12M        | p.T521S       | Sx-ICU, deceased          | <b>181</b>                                                 |



**Supplementary Table 2. Candidate genes used for analysis on DAVID and their respective RVIS score.** A higher RVIS score means the gene is more tolerant to variants.

| <b>Gene<sub>n</sub></b> | <b>RVIS</b> | <b>Gene<sub>n</sub></b> | <b>RVIS<sub>n</sub></b> | <b>Gene<sub>n</sub></b> | <b>RVIS</b> |
|-------------------------|-------------|-------------------------|-------------------------|-------------------------|-------------|
| HMCN1                   | -3.69       | MYO5B                   | -0.37                   | SSFA2                   | 0.24        |
| COL5A1                  | -3.01       | ABCB6                   | -0.37                   | DNPEP                   | 0.24        |
| CELSR1                  | -2.82       | HMBS                    | -0.34                   | PUS3                    | 0.24        |
| FRY                     | -2.66       | GOLIM4                  | -0.33                   | ZNF750                  | 0.32        |
| NCOR2                   | -2.60       | PCM1                    | -0.32                   | TCERG1L                 | 0.33        |
| MLL3                    | -2.52       | HSPG2                   | -0.31                   | RP2                     | 0.35        |
| ABCA7                   | -2.15       | KRT6B                   | -0.30                   | GRAMD2                  | 0.35        |
| CACNA1H                 | -2.06       | FAAH2                   | -0.29                   | PKHD1                   | 0.38        |
| LAMA3                   | -2.06       | DHX58                   | -0.28                   | IQGAP2                  | 0.39        |
| HTT                     | -2.03       | ZFYVE26                 | -0.27                   | DLG1                    | 0.40        |
| IFT172                  | -1.96       | PAQR6                   | -0.27                   | FAM104B                 | 0.41        |
| UTRN                    | -1.55       | ANO9                    | -0.26                   | SCYL1                   | 0.47        |
| RANBP2                  | -1.54       | FRG1                    | -0.25                   | SORBS1                  | 0.48        |
| DCHS1                   | -1.38       | NOL6                    | -0.23                   | MRPS27                  | 0.49        |
| IGSF3                   | -1.34       | GPCPD1                  | -0.20                   | MORC1                   | 0.49        |
| ATP12A                  | -1.32       | ABCG2                   | -0.20                   | TNFRSF13B               | 0.53        |
| DYSF                    | -1.31       | C16orf7                 | -0.18                   | AHCTF1                  | 0.54        |
| SIPA1L2                 | -1.31       | SYNE1                   | -0.16                   | FSTL5                   | 0.54        |
| OSBPL6                  | -1.30       | PPEF1                   | -0.16                   | LETM1                   | 0.54        |
| DEPDC5                  | -1.12       | SETX                    | -0.14                   | SMPDL3A                 | 0.57        |
| DHX34                   | -1.02       | RBM23                   | -0.13                   | ADAM18                  | 0.59        |
| CHD6                    | -0.97       | CDC27                   | -0.12                   | TMEM123                 | 0.59        |
| TTC3                    | -0.97       | OTOF                    | -0.11                   | DEFB104A                | 0.61        |
| MYH7B                   | -0.89       | GGT1                    | -0.09                   | SDSL                    | 0.62        |
| CHPF                    | -0.86       | ZNF18                   | -0.07                   | PKP2                    | 0.65        |
| ACOX3                   | -0.79       | HABP2                   | -0.06                   | CCDC135                 | 0.72        |
| ADAMTS20                | -0.75       | NTRK1                   | -0.06                   | ABCA4                   | 0.74        |
| MYH8                    | -0.69       | MCM10                   | -0.03                   | OR5V1                   | 0.75        |
| TMC1                    | -0.64       | TMCO7                   | -0.01                   | CARKD                   | 0.76        |
| MYH13                   | -0.64       | TBC1D1                  | 0.01                    | CLYBL                   | 0.77        |
| ENGASE                  | -0.63       | TIMM44                  | 0.09                    | B4GALNT2                | 0.80        |
| PLCG2                   | -0.60       | ATRN                    | 0.12                    | NEB                     | 0.88        |
| GOLGA3                  | -0.57       | ITIH2                   | 0.15                    | GAS2L3                  | 0.89        |
| RGS12                   | -0.46       | ADRA1A                  | 0.16                    | ZNF763                  | 0.93        |
| GTPBP2                  | -0.43       | DNAJC13                 | 0.17                    | N4BP2                   | 0.95        |
| MST1                    | -0.42       | TCTN1                   | 0.18                    | TAS2R19                 | 1.00        |
| FOXK2                   | -0.42       | GAS8                    | 0.21                    | RENBP                   | 1.00        |
| NCAPD3                  | -0.37       | PTPRC                   | 0.23                    |                         |             |

**Supplementary Table 3. List of genes in annotation cluster1 (highest enrichment score) from DAVID.** Enrichment score is calculated from the minus log transformation of the geometric mean of all P-values in the cluster. Benjamini: P-value corrected for multiple testing using the Benjamini and Hochberg method. A total of 35 annotation clusters were generated. GOTERM\_MF\_FAT and GOTERM\_CC\_FAT: Gene Ontology (GO) term >Molecular Function and >Cellular Component on the GO database, respectively.

| Annotation cluster 1 |                                      |                                                  |         |           |
|----------------------|--------------------------------------|--------------------------------------------------|---------|-----------|
| Category             | Term                                 | Genes                                            | P-Value | Benjamini |
| GOTERM_MF_FAT        | GO:0030554~adenyl nucleotide binding | ABCA7, RP2, ATP12A, MORC1, ABCA4, ABCB6, TIMM44, | 0.0014  | 0.10      |
| GOTERM_MF_FAT        | GO:0001883~purine nucleoside binding | MYH8, ABCG2, ACOX3, SETX, N4BP2, RENBP, SCYL1,   | 0.0017  | 0.08      |
| GOTERM_MF_FAT        | GO:0001882~nucleoside binding        | NTRK1, DHX34, MYH13, CHD6, MYH7B, MYO5B, DHX58   | 0.0018  | 0.07      |

**Supplementary Table 4.** Genotype frequency of ABCB6 variants that result in non-synonymous amino acid changes. Data extracted from EVS database in September 2013. All the variants were present as heterozygous. There were total of 419 variant alleles found in at least 4602 individuals.

| <u>Protein Change</u> | <u>cDNA Change</u> | <u>EA Genotype #</u> |
|-----------------------|--------------------|----------------------|
| p.(P837L)             | c.2510C>T          | AA=0/AG=1/GG=4299    |
| p.(Y818C)             | c.2453A>G          | CC=0/CT=1/TT=4299    |
| p.(A810V)             | c.2429C>T          | AA=0/AG=0/GG=4300    |
| p.(G800V)             | c.2399G>T          | AA=0/AC=1/CC=4299    |
| p.(T778I)             | c.2333C>T          | AA=0/AG=0/GG=4300    |
| p.(R776S)             | c.2326C>A          | TT=0/TG=1/GG=4299    |
| p.(V772F)             | c.2314G>T          | AA=0/AC=1/CC=4299    |
| p.(R739C)             | c.2215C>T          | AA=0/AG=4/GG=4296    |
| p.(G730R)             | c.2188G>A          | TT=0/TC=0/CC=4300    |
| p.(R723Q)             | c.2168G>A          | TT=0/TC=9/CC=4291    |
| p.(R723W)             | c.2167C>T          | AA=0/AG=1/GG=4299    |
| p.(I705M)             | c.2115C>G          | CC=0/CG=0/GG=4300    |
| p.(A702V)             | c.2105C>T          | AA=0/AG=0/GG=4300    |
| p.(R685C)             | c.2053C>T          | AA=0/AG=0/GG=4300    |
| p.(D682N)             | c.2044G>A          | TT=0/TC=0/CC=4300    |
| p.(A681T)             | c.2041G>A          | TT=0/TC=7/CC=4293    |
| p.(D672E)             | c.2016C>G          | CC=0/CG=1/GG=4299    |
| p.(D672N)             | c.2014G>A          | TT=0/TC=1/CC=4299    |
| p.(A660V)             | c.1979C>T          | AA=0/AG=0/GG=4300    |
| p.(R648Q)             | c.1943G>A          | TT=0/TC=1/CC=4299    |
| p.(V609M)             | c.1825G>A          | TT=0/TC=0/CC=4300    |
| p.(E604D)             | c.1812G>C          | GG=0/GC=1/CC=4299    |
| p.(G588S)             | c.1762G>A          | TT=0/TC=57/CC=4243   |
| p.(R584H)             | c.1751G>A          | TT=0/TC=1/CC=4299    |

|           |           |                     |
|-----------|-----------|---------------------|
| p.(L577F) | c.1729C>T | AA=0/AG=1/GG=4299   |
| p.(F565S) | c.1694T>C | GG=0/GA=1/AA=4299   |
| p.(P543L) | c.1628C>T | AA=0/AG=1/GG=4299   |
| p.(T521S) | c.1562C>G | CC=0/CG=34/GG=4266  |
| p.(T521A) | c.1561A>G | CC=0/CT=2/TT=4298   |
| p.(S513P) | c.1537T>C | GG=0/GA=0/AA=4300   |
| p.(G512S) | c.1534G>A | TT=0/TC=0/CC=4300   |
| p.(A511T) | c.1531G>A | TT=0/TC=1/CC=4299   |
| p.(A492T) | c.1474G>A | TT=0/TC=78/CC=4222  |
| p.(R475C) | c.1423C>T | AA=0/AG=0/GG=4300   |
| p.(L457P) | c.1370T>C | GG=0/GA=1/AA=4299   |
| p.(V454A) | c.1361T>C | GG=0/GA=2/AA=4298   |
| p.(N447S) | c.1340A>G | CC=0/CT=1/TT=4299   |
| p.(I429V) | c.1285A>G | CC=0/CT=2/TT=4298   |
| p.(L425V) | c.1273C>G | CC=0/CG=0/GG=4300   |
| p.(L415F) | c.1243C>T | AA=0/AG=1/GG=4299   |
| p.(R371Q) | c.1112G>A | TT=0/TC=1/CC=4297   |
| p.(L358V) | c.1072C>G | CC=0/CG=1/GG=4295   |
| p.(R343Q) | c.1028G>A | TT=0/TC=10/CC=4286  |
| p.(F332L) | c.994T>C  | GG=0/GA=0/AA=4294   |
| p.(K313E) | c.937A>G  | CC=0/CT=0/TT=4300   |
| p.(T307S) | c.920C>G  | CC=0/CG=1/GG=4299   |
| p.(L302V) | c.904C>G  | CC=0/CG=0/GG=4300   |
| p.(P283S) | c.847C>T  | AA=0/AG=0/GG=4286   |
| p.(R276W) | c.826C>T  | AA=0/AG=114/GG=4183 |
| p.(L263V) | c.787C>G  | CC=0/CG=1/GG=4298   |
| p.(S228R) | c.684C>G  | CC=0/CG=1/GG=4299   |
| p.(E220V) | c.659A>T  | AA=0/AT=6/TT=4294   |

|           |          |                    |
|-----------|----------|--------------------|
| p.(R210C) | c.628C>T | AA=0/AG=1/GG=4299  |
| p.(G208R) | c.622G>A | TT=0/TC=1/CC=4299  |
| p.(G197R) | c.589G>A | TT=0/TC=1/CC=4299  |
| p.(R192Q) | c.575G>A | TT=0/TC=36/CC=4264 |
| p.(R192W) | c.574C>T | AA=0/AG=21/GG=4279 |
| p.(A164T) | c.490G>A | TT=0/TC=3/CC=4297  |
| p.(A157V) | c.470C>T | AA=0/AG=1/GG=4299  |
| p.(S147G) | c.439A>G | CC=0/CT=2/TT=4298  |
| p.(R129Q) | c.386G>A | TT=0/TC=2/CC=4297  |
| p.(L125F) | c.373C>T | AA=0/AG=0/GG=4292  |
| p.(A92V)  | c.275C>T | AA=0/AG=3/GG=4229  |

**Supplementary Table 5. Predicted effect of rare ABCB6 variants identified in porphyric patients.** Different *in silico* protein prediction methods were used (stability, conservation, etc.)

| ABCB6            | BLOSUM50 | PAM250 | Grantham Value | PolyPhen-2 (HumDiv class:Score) | SIFT  | I-Mutant Suite  |
|------------------|----------|--------|----------------|---------------------------------|-------|-----------------|
| <b>Threshold</b> | <0       | <0     | >50            | >0.85                           | <0.05 | <0.5; >0.5      |
| <b>R192Q</b>     | 1        | 1      | 43             | probably-damaging:0.985         | 0.01  | Decrease, -0.86 |
| <b>R276W</b>     | -3       | -2     | 101            | probably-damaging:1.0           | 0.00  | Decrease -0.36  |
| <b>A492T</b>     | 0        | 1      | 58             | probably-damaging:0.979         | 0.07  | Decrease -0.49  |
| <b>T521S</b>     | 2        | 1      | 58             | benign:0.0                      | 0.41  | Decrease -0.65  |
| <b>G588S</b>     | 0        | 1      | 56             | probably-damaging:1.0           | 0.00  | Decrease -1.21  |
| <b>A681T</b>     | -1       | -1     | 58             | possibly-damaging:0.941         | 0.40  | Decrease -1.08  |
